# Supplementary material
Source: PubMed Central journal article supplement (PMC9132052)
Supplement: JSLHR-64-3734-s001.pdf [file JSLHR-64-3734-s001.pdf]

**Supplemental Material S1.** Descriptive statistics for pharyngeal swallowing pressures in younger and older participants during normal effort and effortful swallows.

| <b>Metric</b>                                             | <b>Normal effort mean <math>\pm</math> SEM</b> | <b>Effortful mean <math>\pm</math> SEM</b> |
|-----------------------------------------------------------|------------------------------------------------|--------------------------------------------|
| <b>Velopharynx maximum pressure (mmHg)</b>                |                                                |                                            |
| Younger                                                   | 150.0 $\pm$ 7.7                                | 179.9 $\pm$ 10.7                           |
| Older                                                     | 178.0 $\pm$ 12.3                               | 216.0 $\pm$ 15.5                           |
| <b>Tongue base maximum pressure (mmHg)</b>                |                                                |                                            |
| Younger                                                   | 135.8 $\pm$ 7.6                                | 157.0 $\pm$ 12.0                           |
| Older                                                     | 122.0 $\pm$ 11.0                               | 170.6 $\pm$ 17.4                           |
| <b>Hypopharynx maximum pressure (mmHg)</b>                |                                                |                                            |
| Younger                                                   | 184.2 $\pm$ 17.8                               | 198.0 $\pm$ 18.5                           |
| Older                                                     | 138.3 $\pm$ 25.8                               | 164.4 $\pm$ 26.9                           |
| <b>Pharyngeal contractile integral (mmHg*sec)</b>         |                                                |                                            |
| Younger                                                   | 242.6 $\pm$ 16.4                               | 332.9 $\pm$ 30.8                           |
| Older                                                     | 252.9 $\pm$ 23.8                               | 404.5 $\pm$ 44.7                           |
| <b>Upper esophageal sphincter minimum pressure (mmHg)</b> |                                                |                                            |
| Younger                                                   | 0.6 $\pm$ 1.2                                  | 0.7 $\pm$ 1.7                              |
| Older                                                     | 4.3 $\pm$ 1.7                                  | 9.8 $\pm$ 2.5                              |

Note. SEM = standard error of the mean.
