# Supplementary material
Source: PubMed Central journal article supplement (PMC9132052)
Supplement: JSLHR-64-3734-s002.pdf [file JSLHR-64-3734-s002.pdf]

**Supplemental Material S2.** Comparative statistics for repeated-measures ANOVA evaluating impact of task, age, and pharyngeal region on pharyngeal maximum pressures.

| <b>Comparison</b>                            | <b>Test statistic</b> | <b><i>p</i>-value</b> | <b>Partial <math>\eta^2</math></b> |
|----------------------------------------------|-----------------------|-----------------------|------------------------------------|
| Task                                         | $F_{1,108} = 18.482$  | < .001*               | .255                               |
| Task $\times$ Age                            | $F_{1,108} = 1.339$   | .252                  | .024                               |
| Pharyngeal Region                            | $F_{1.4,108} = 3.866$ | .039*                 | .067                               |
| Pharyngeal Region $\times$ Age               | $F_{2,108} = 3.918$   | .023*                 | .068                               |
| Task $\times$ Pharyngeal Region              | $F_{1.4,108} = 1.327$ | .268                  | .024                               |
| Task $\times$ Pharyngeal Region $\times$ Age | $F_{1.7,108} = 0.479$ | .591                  | .009                               |

\*Statistically significant relationship.
