# Supplementary material
Source: PubMed Central journal article supplement (PMC9132052)
Supplement: JSLHR-64-3734-s003.pdf [file JSLHR-64-3734-s003.pdf]

**Supplemental Material S3.** Comparative statistics for repeated-measures ANOVA evaluating impact of task and age on pharyngeal contractile integral.

| <b>Comparison</b> | <b>Test statistic</b> | <b><i>p</i>-value</b> | <b>Partial <math>\eta^2</math></b> |
|-------------------|-----------------------|-----------------------|------------------------------------|
| Task              | $F_{1,54} = 30.339$   | < .001*               | .360                               |
| Task $\times$ Age | $F_{1,54} = 1.943$    | .169                  | .035                               |

\*Statistically significant relationship.
