# Supplementary material
Source: PubMed Central journal article supplement (PMC9132052)
Supplement: JSLHR-64-3734-s004.pdf [file JSLHR-64-3734-s004.pdf]

**Supplemental Material S4.** Comparative statistics for repeated-measures ANOVA evaluating impact of task and age on upper esophageal sphincter minimum pressure.

| <b>Comparison</b> | <b>Test statistic</b> | <b><i>p</i>-value</b> | <b>Partial <math>\eta^2</math></b> |
|-------------------|-----------------------|-----------------------|------------------------------------|
| Task              | $F_{1,54} = 5.417$    | .024*                 | .091                               |
| Task $\times$ Age | $F_{1,54} = 5.142$    | .027*                 | .087                               |

\*Statistically significant relationship.
